# Supplementary material for: Formation of Ni 2.8 S 2 -based heterojunctions with dual non-interfacial metal vacancies for enhanced hydrogen evolution performance
Source: Royal Society of Chemistry journal article supplement (doi:10.1039/d5dt02557e), 2025-11-29
Supplement: d5dt02557e1.pdf [file d5dt02557e1.pdf]

## Supporting Information

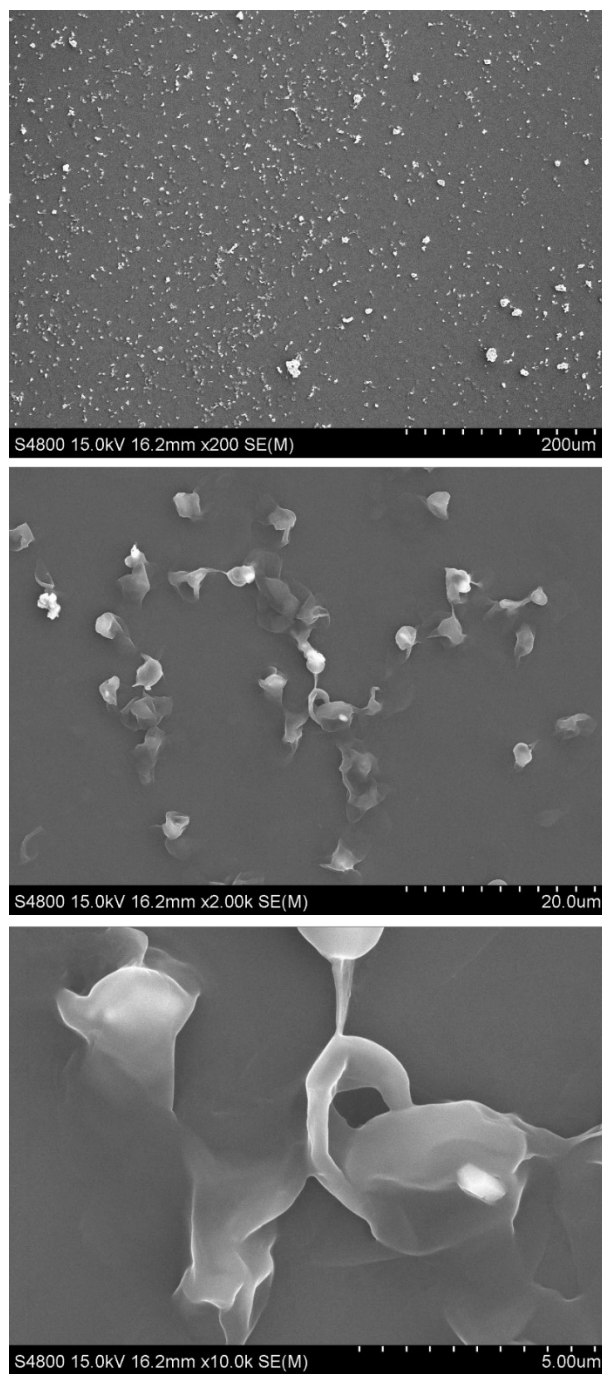

Figure S1. SEM photos of nio-NiS/NiSe<sub>2</sub> at various magnifications.

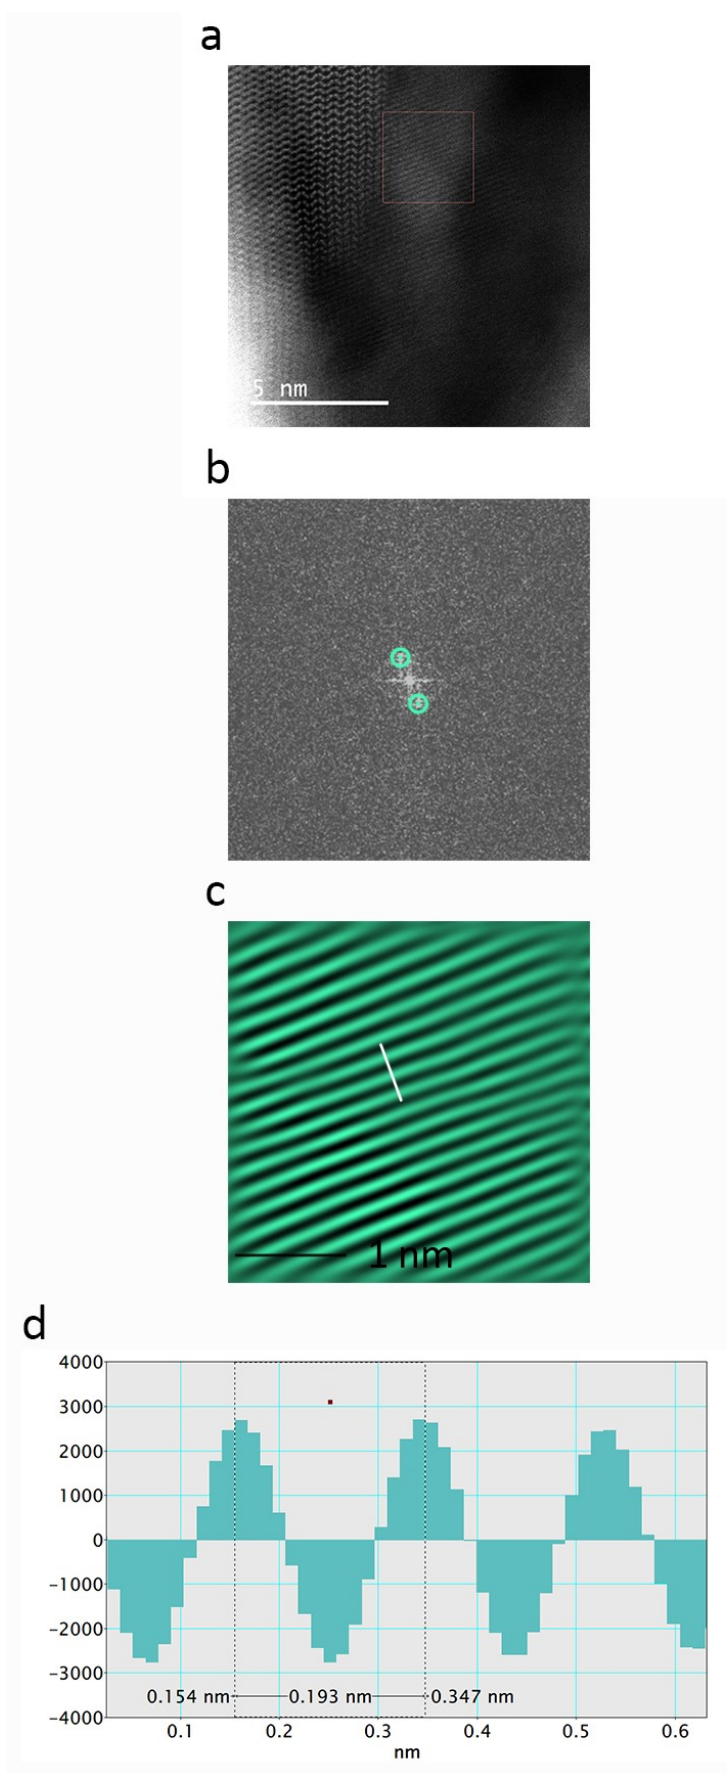

Figure S2. TEM photos of nio-NiS/NiSe<sub>2</sub>.

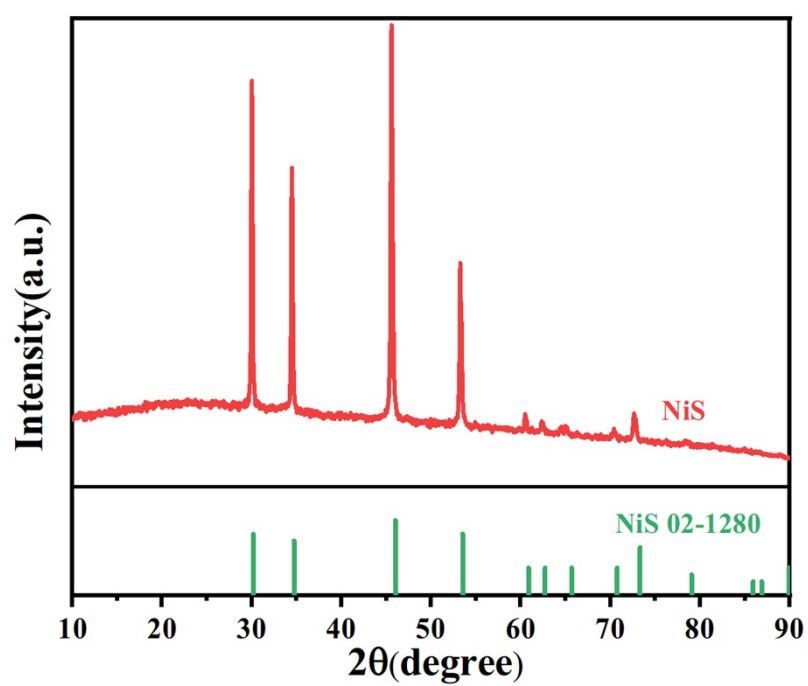

Figure S3. PXRD of NiS.

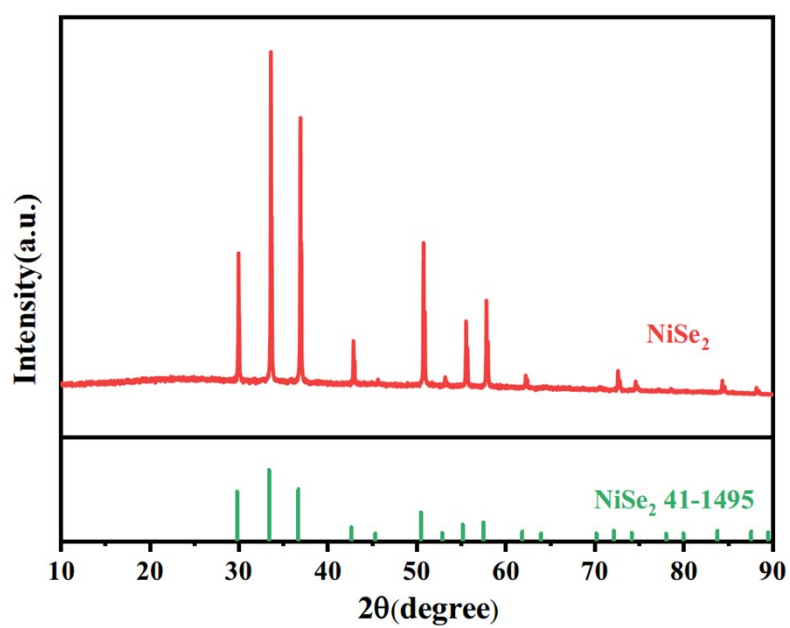

Figure S4. PXRD of NiSe<sub>2</sub>.

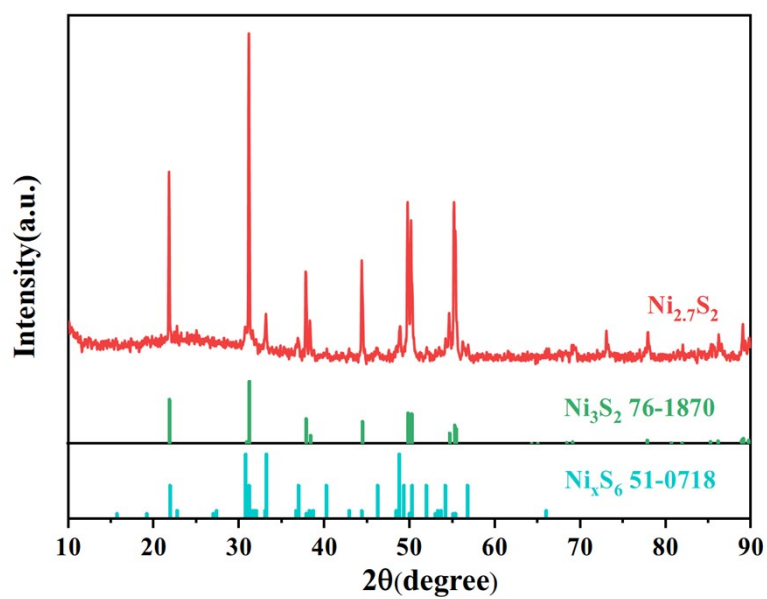

Figure S5. PXRD of  $\text{Ni}_{2.7}\text{S}_2$ .

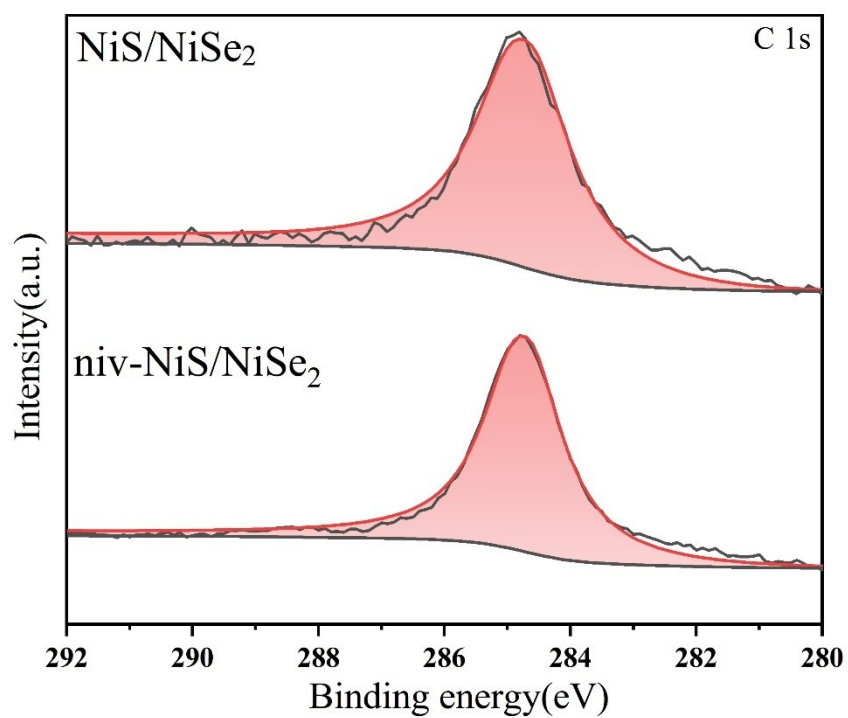

Figure S6. C 1s XPS spectra of  $\text{NiS/NiSe}_2$  and  $\text{niv-NiS/NiSe}_2$ , respectively.

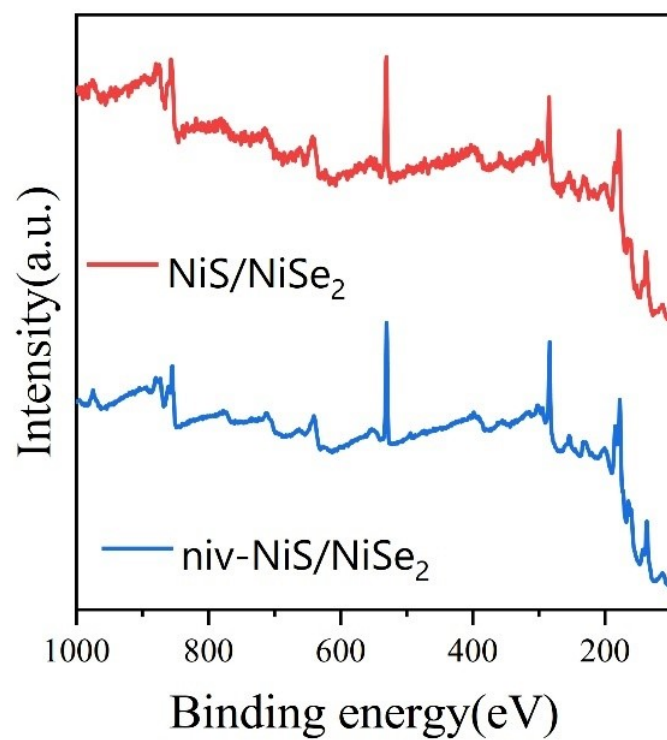

Figure S7. XPS survey of NiS/NiSe<sub>2</sub> and niv-NiS/NiSe<sub>2</sub>, respectively.

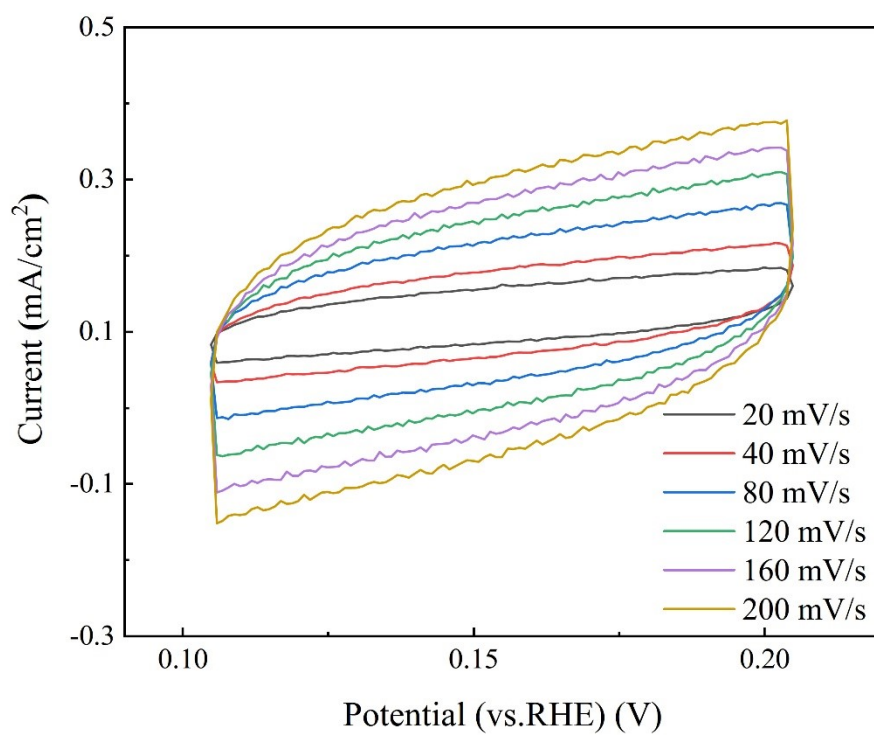

Figure S8. CV sweeps of Ni<sub>3</sub>S<sub>2</sub>.

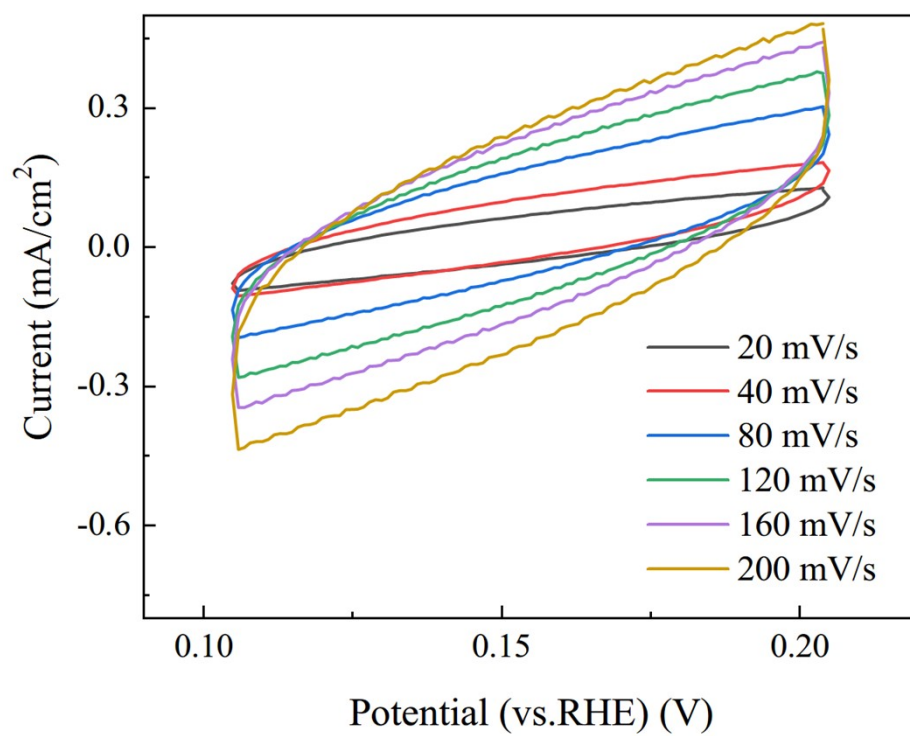

Figure S9. CV sweeps of  $\text{Ni}_{2.8}\text{S}_2$ .

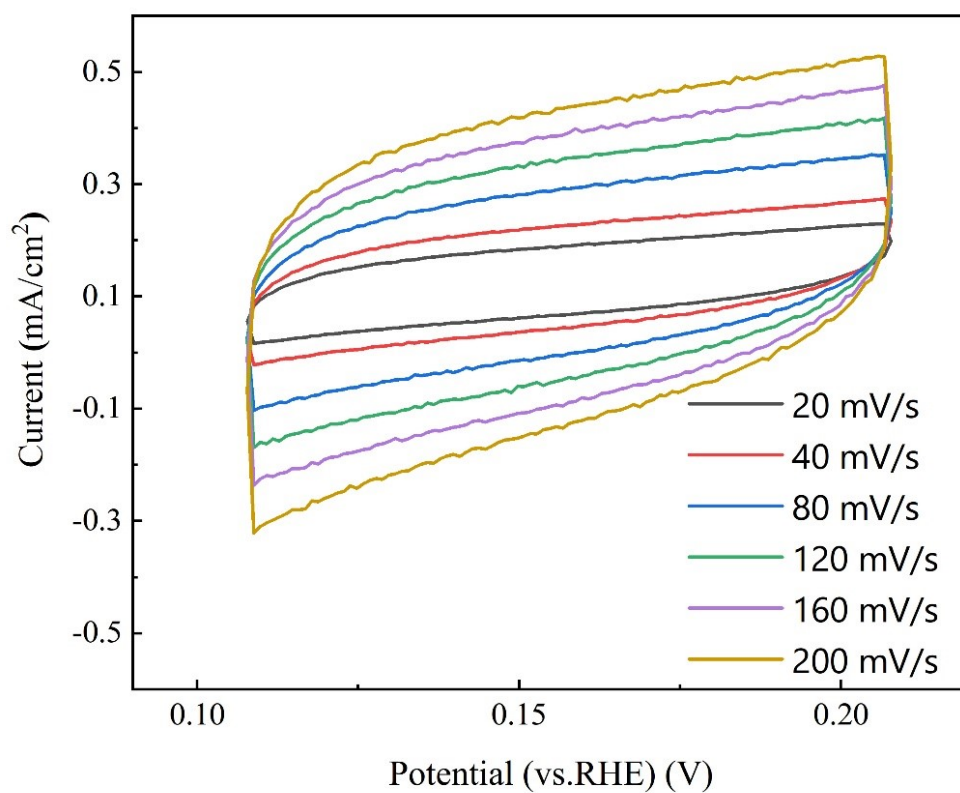

Figure S10. CV sweeps of  $\text{NiS}/\text{NiSe}_2$ .

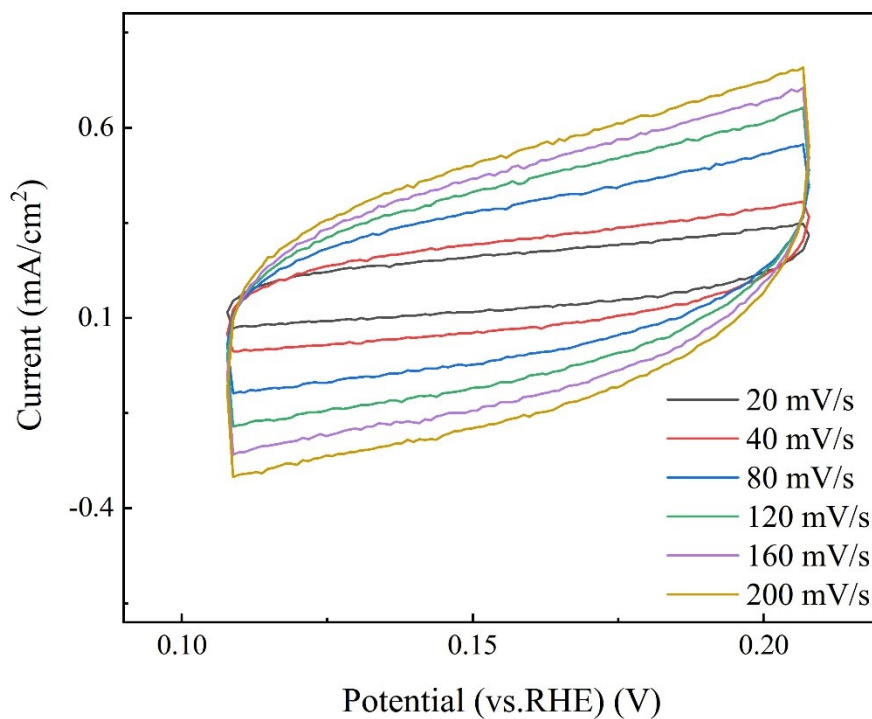

Figure S11. CV sweeps of niv-NiS/NiSe<sub>2</sub>.

**Table S1.** Summary of the electrochemical data of various electrocatalysts in 0.5 M H<sub>2</sub>SO<sub>4</sub>.

| Sample                           | HER Activity |                         | $C_{dl}$<br>(mF cm <sup>-2</sup> ) | EIS       |              |
|----------------------------------|--------------|-------------------------|------------------------------------|-----------|--------------|
|                                  | $h_{10}$     | Tafel Slope             |                                    | $R_s$ (Ω) | $R_{ct}$ (Ω) |
|                                  | (mV)         | (mV dec <sup>-1</sup> ) |                                    |           |              |
| Ni <sub>3</sub> S <sub>2</sub>   | 348          | 179.8                   | 0.81                               | 3.67      | 863.8        |
| Ni <sub>2.8</sub> S <sub>2</sub> | 252          | 84.1                    | 1.05                               | 3.60      | 428.3        |
| NiS/NiSe <sub>2</sub>            | 200          | 58.4                    | 1.22                               | 3.05      | 199.6        |
| niv-NiS/NiSe <sub>2</sub>        | 96           | 41.3                    | 1.61                               | 3.69      | 102          |

$\eta_{10}$ : the overpotential at the current density of 10 mA cm<sup>-2</sup>;  $C_{dl}$ : double layer capacitance;  $R_s$  and  $R_{ct}$ : electrolyte resistivity and electron transfer resistivity fitted from EIS analysis, respectively.

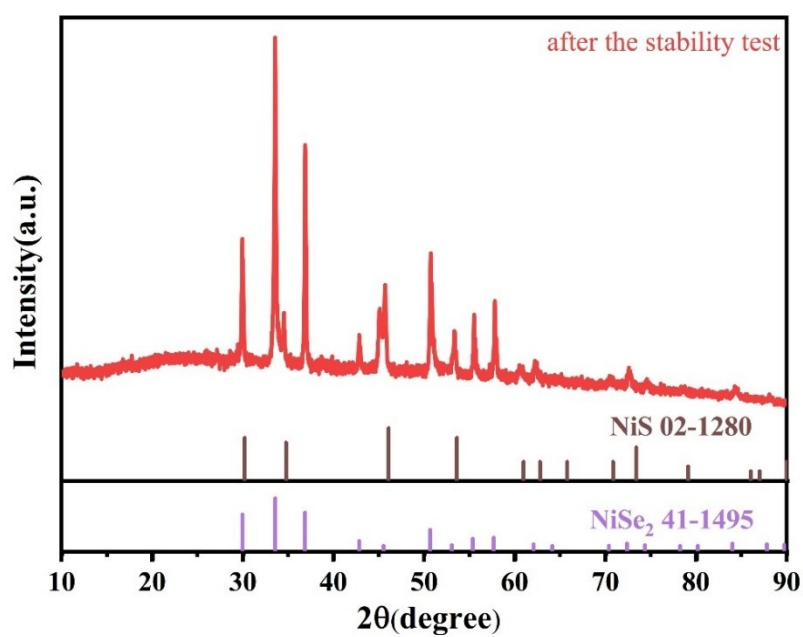

Figure S12. PXPD of niv-NiS/NiSe<sub>2</sub> after the stability test, respectively.

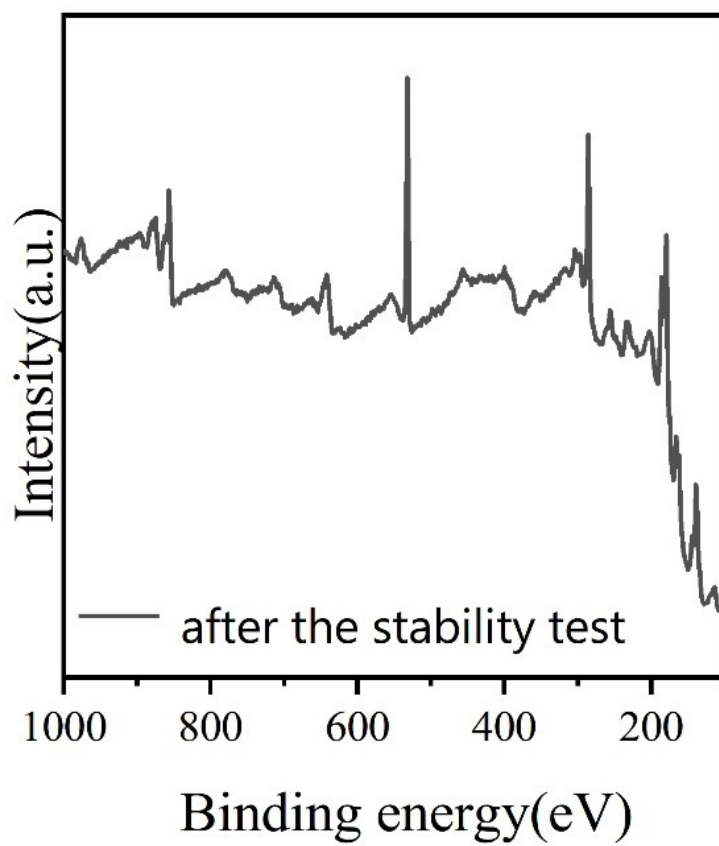

Figure S13. XPS survey of niv-NiS/NiSe<sub>2</sub> after the stability test, respectively.



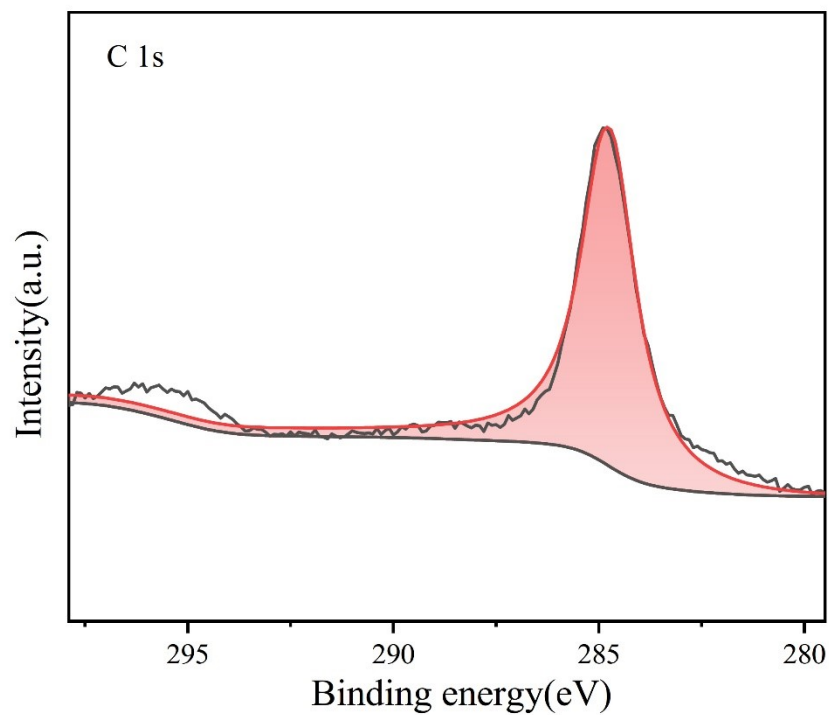

Figure S14. C 1s XPS spectra of niv-NiS/NiSe<sub>2</sub> after the stability test, respectively.

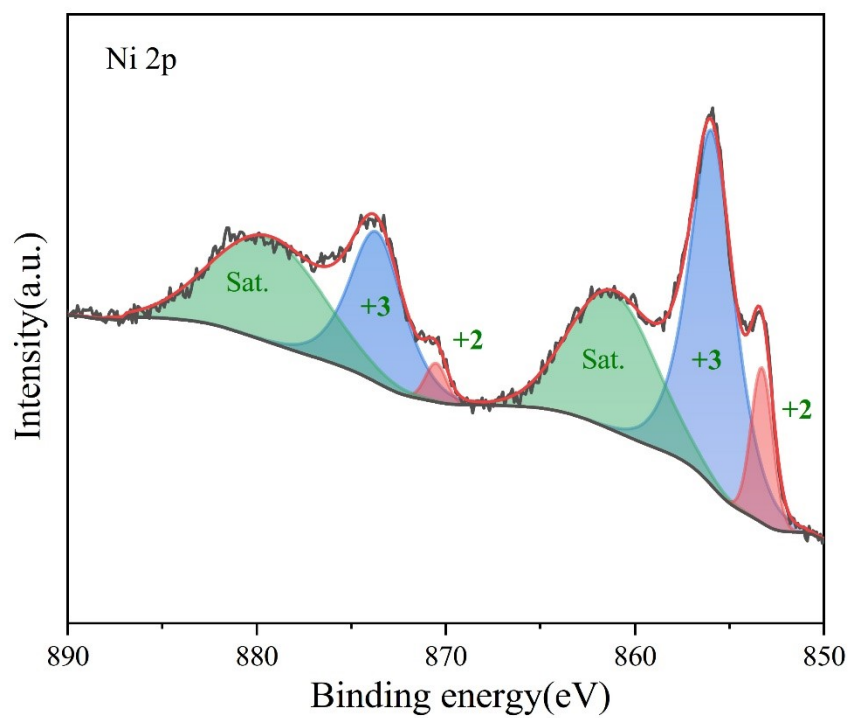

Figure S15. Ni 2p XPS spectra of niv-NiS/NiSe<sub>2</sub> after the stability test, respectively.

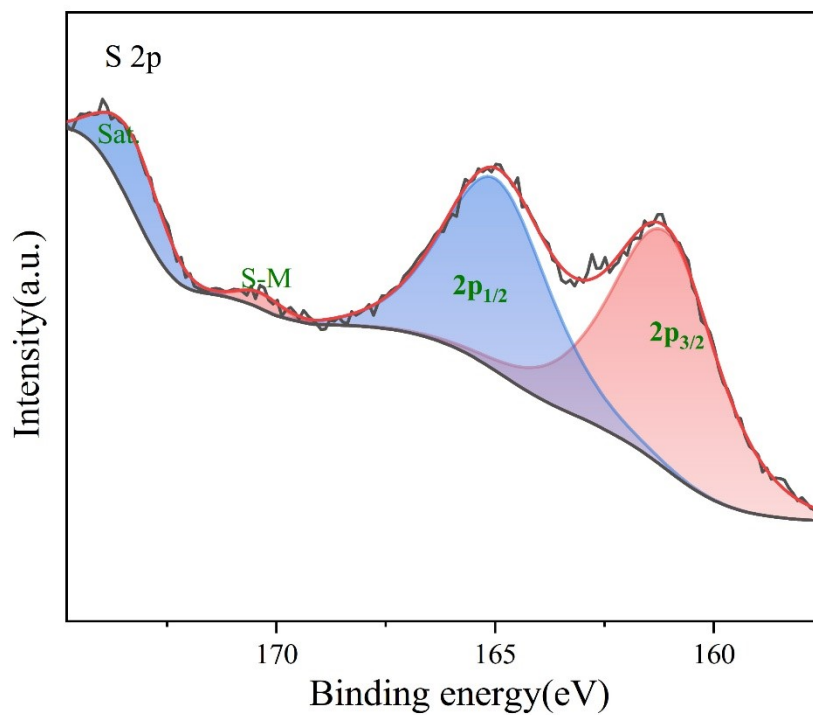

Figure S16. S 2p XPS spectra of niv-NiS/NiSe<sub>2</sub> after the stability test, respectively.

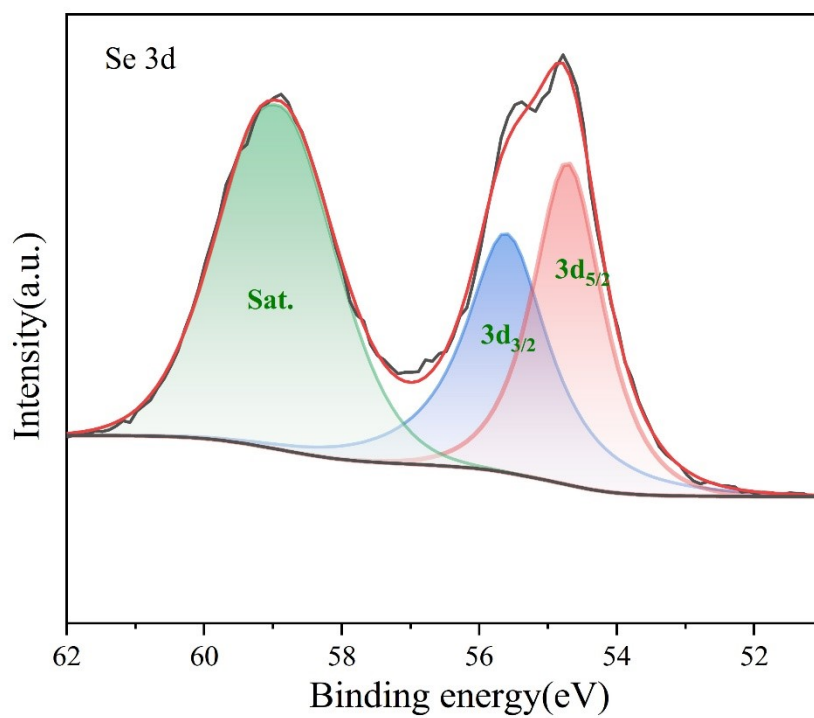

Figure S17. Se 3d XPS spectra of niv-NiS/NiSe<sub>2</sub> after the stability test, respectively.

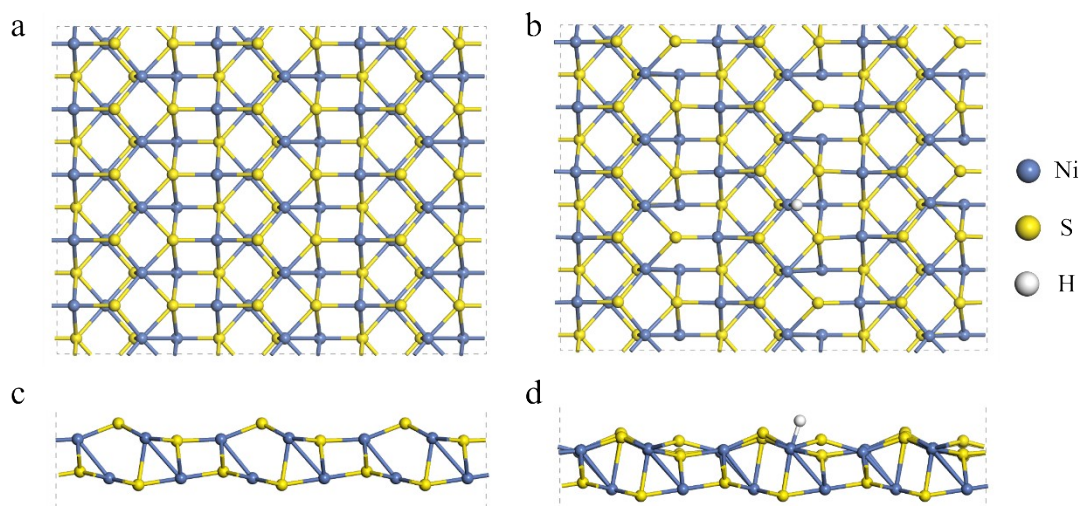

Figure S18. (a), (c) Top and side view of NiS(102). (b), (d) Top and side view of NiS(102) adsorbing H atom. Ni, S and H atom are marked by blue, yellow and white balls, respectively.

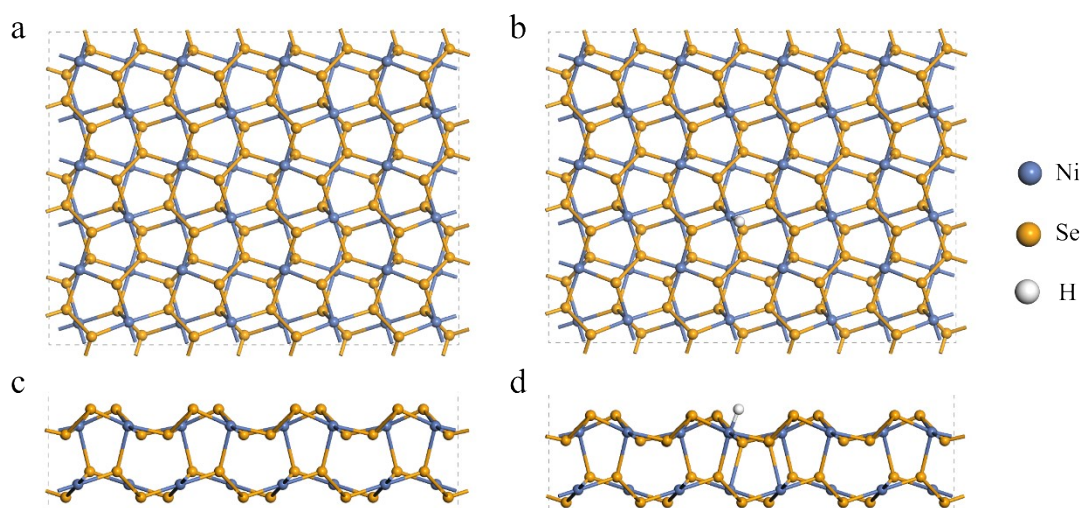

Figure S19. (a), (c) Top and side view of NiSe<sub>2</sub>(010). (b), (d) Top and side view of NiSe<sub>2</sub>(010) adsorbing H atom. Ni, Se and H atom are marked by blue, orange and white balls, respectively.

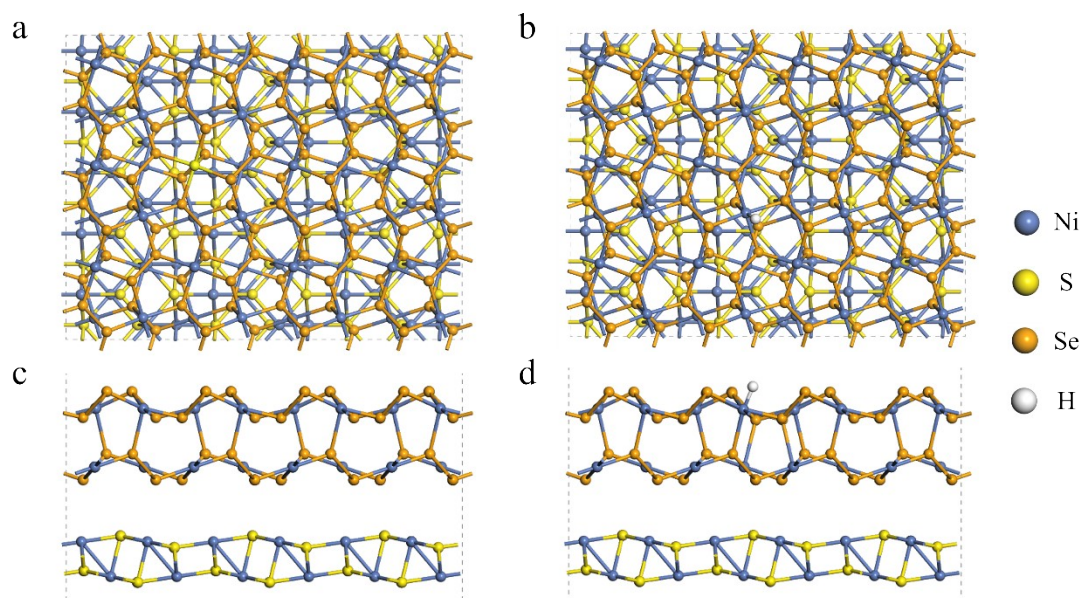

Figure S20. (a), (c) Top and side view of heterostructure of  $\text{NiSe}_2/\text{NiS}$ . (b), (d) Top and side view of heterostructure of  $\text{NiSe}_2/\text{NiS}$  adsorbing H atom. Ni, S, Se and H atom are marked by blue, yellow, orange and white balls, respectively.

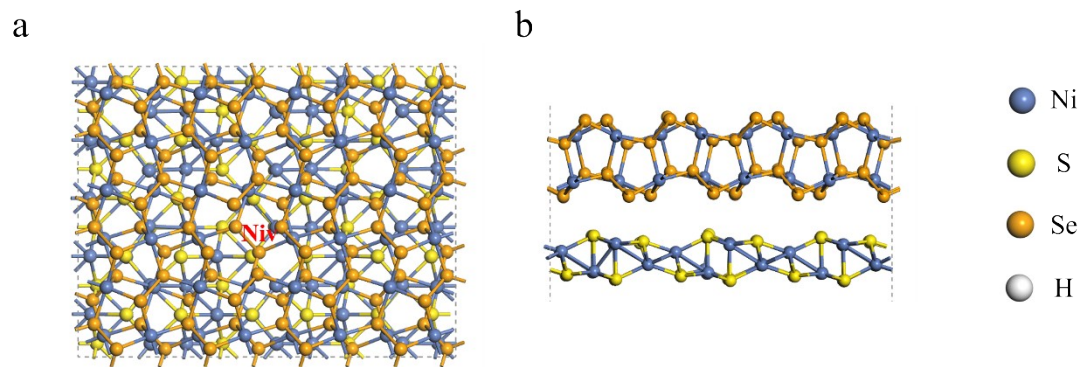

Figure S21 (a), (b) Top and side view of heterostructure of niv-NiSe<sub>2</sub>/NiS. Ni vacancy was marked in (a).
